# Supplementary material for: National Trends in Psychiatric Not Otherwise Specified (NOS) Diagnosis and Medication Use Among Adults in Outpatient Treatment
Source: Atypon-hosted journal article supplement (doi:10.1176/appi.ps.201500045), 2015-11-16
Supplement: appi.ps.201500045.ds001.pdf [file appi.ps.201500045.ds001.pdf]

**Supplement Table. List of unspecified 'Not otherwise specified' diagnoses included in this study**

| <b>ICD 9 code</b> | <b>Description</b>                                                             |
|-------------------|--------------------------------------------------------------------------------|
| 290.9             | Unspecified senile psychotic condition                                         |
| 291.9             | Unspecified alcohol-induced mental disorders                                   |
| 292.9             | Unspecified drug-induced mental disorder                                       |
| 293.9             | Unspecified transient mental disorder in conditions classified elsewhere       |
| 294.9             | Unspecified persistent mental disorders due to conditions classified elsewhere |
| 296.80            | Bipolar disorder, unspecified                                                  |
| 296.90            | Unspecified episodic mood disorder                                             |
| 297.9             | Unspecified paranoid state                                                     |
| 298.9             | Unspecified psychosis                                                          |
| 299.9             | Unspecified pervasive developmental disorder                                   |
| 300.00            | Anxiety state, unspecified                                                     |
| 300.20            | Phobia unspecified                                                             |
| 300.9             | Unspecified nonpsychotic mental disorder                                       |
| 301.10            | Affective personality disorder unspecified                                     |
| 301.9             | Unspecified personality disorder                                               |
| 302.70            | Psychosexual dysfunction unspecified                                           |
| 302.9             | Unspecified psychosexual disorder                                              |
| 304.9             | Unspecified drug dependence                                                    |
| 306.50            | Psychogenic genitourinary malfunction unspecified                              |
| 306.9             | Unspecified psychophysiological malfunction                                    |
| 307.20            | Tic disorder, unspecified                                                      |
| 307.40            | Nonorganic sleep disorder unspecified                                          |
| 307.50            | Eating disorder unspecified                                                    |
| 308.9             | Unspecified acute reaction to stress                                           |
| 309.9             | Unspecified adjustment reaction                                                |
| 310.9             | Unspecified nonpsychotic mental disorder following organic brain damage        |
| 311               | Depressive disorder, not elsewhere classified                                  |
| 312.30            | Impulse control disorder unspecified                                           |
| 312.9             | Unspecified disturbance of conduct                                             |
| 313.9             | Unspecified emotional disturbance of childhood or adolescence                  |
| 314.9             | Unspecified hyperkinetic syndrome                                              |
| 315.9             | Unspecified delay in development                                               |
| 319               | Unspecified mental retardation                                                 |
